# Supplementary material for: Pure aromatic hydrocarbons with rigid and bulky substituents as bipolar hosts for blue phosphorescent OLEDs
Source: Royal Society of Chemistry journal article supplement (doi:10.1039/c5tc01913c), 2015-01-01

### 1. Device performance of NPB (60 nm) / mDPFB (35 nm) / Alq (25 nm) / LiF / Al:

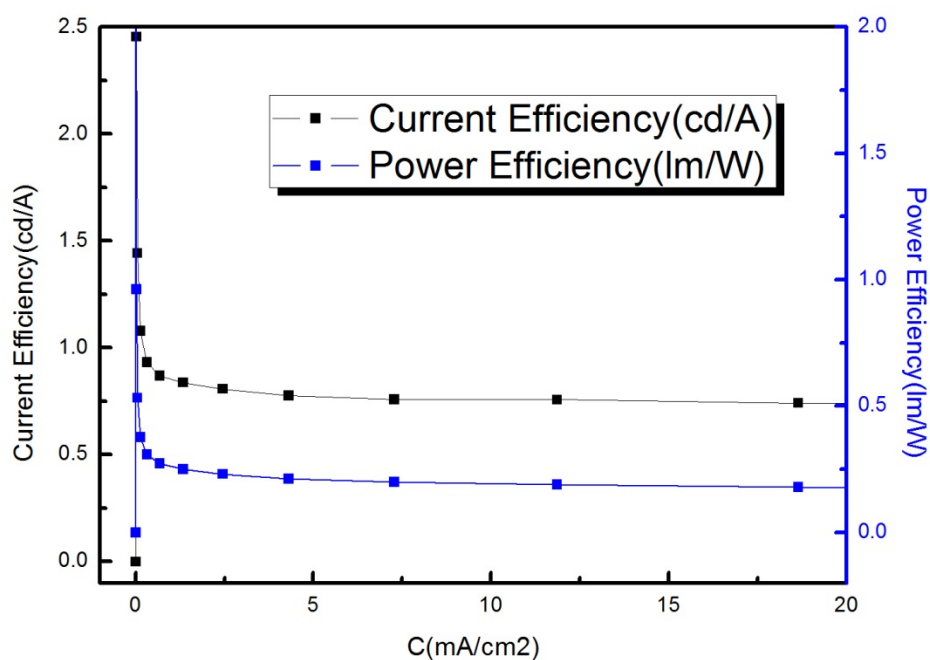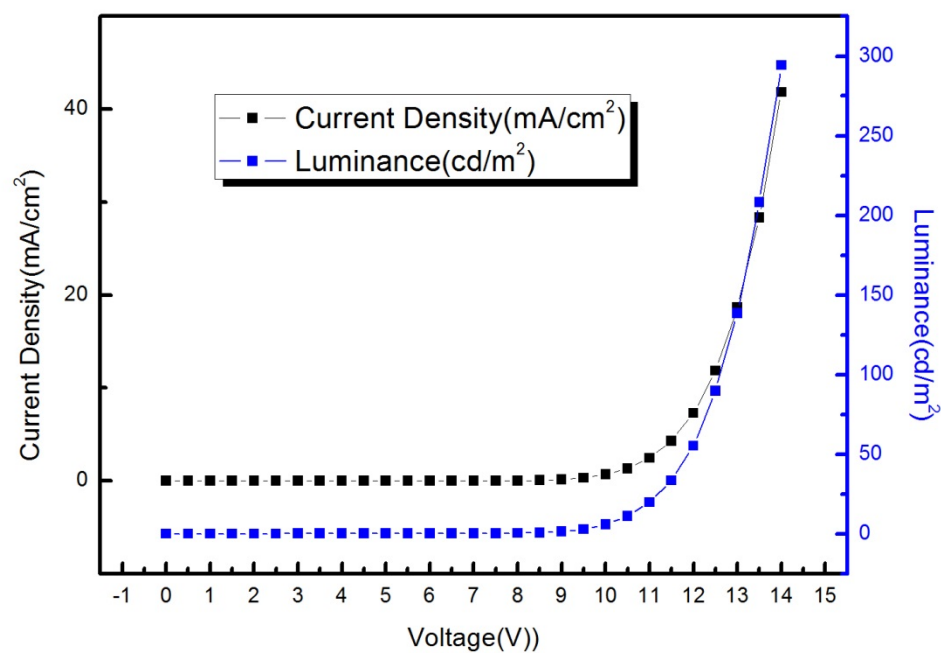

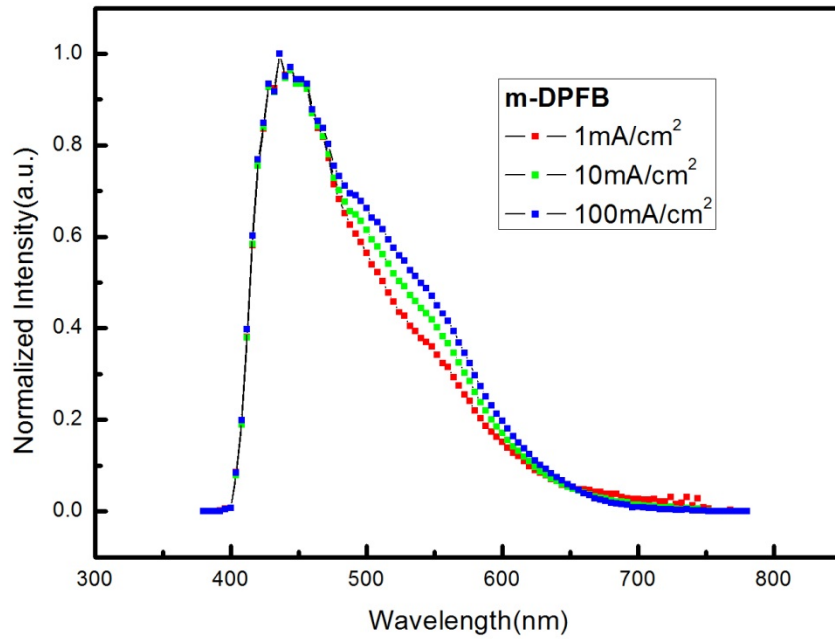

**2. Device performance of NPB (60 nm) / pDPFDB (35 nm) / Alq (25nm) / LiF / Al:**

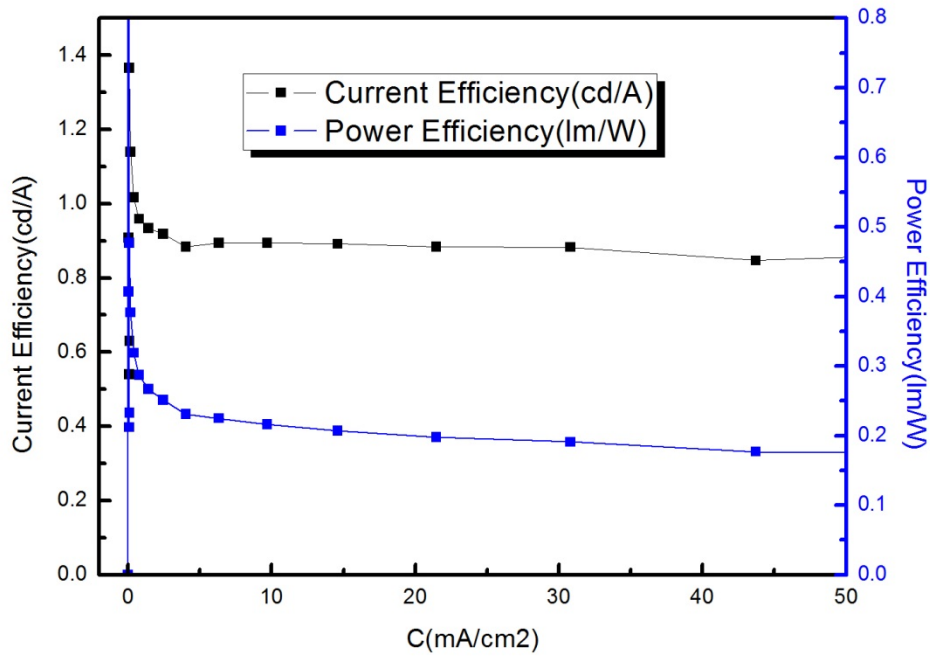

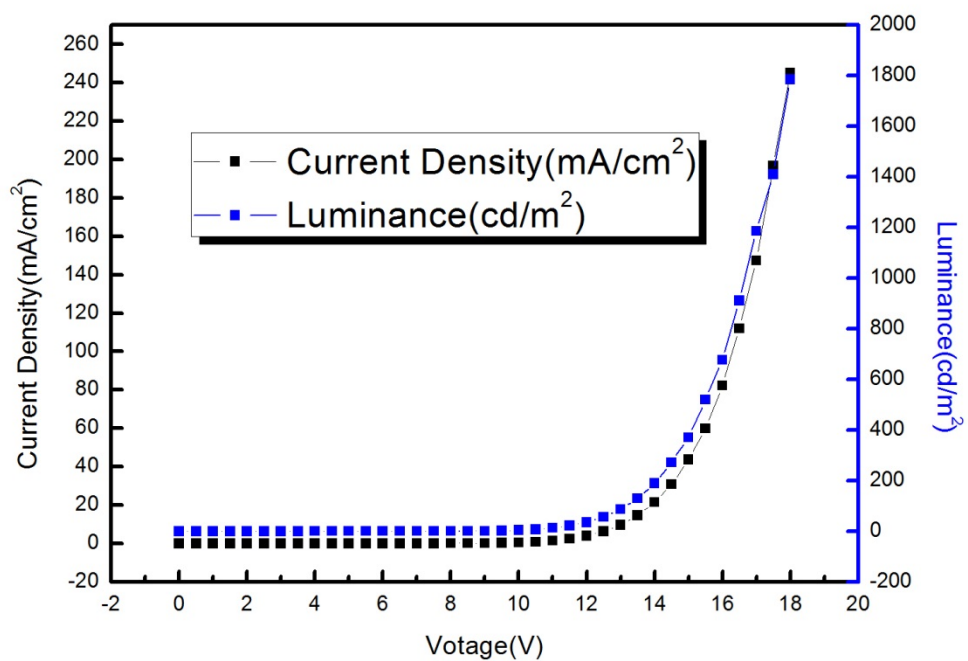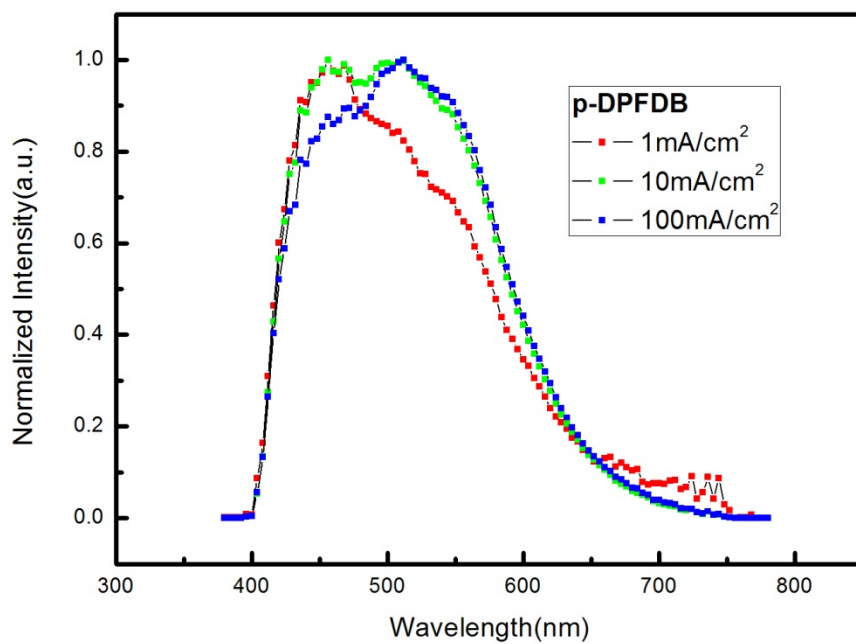

3. PL spectra of film of 8% Firpic in mDPFB.

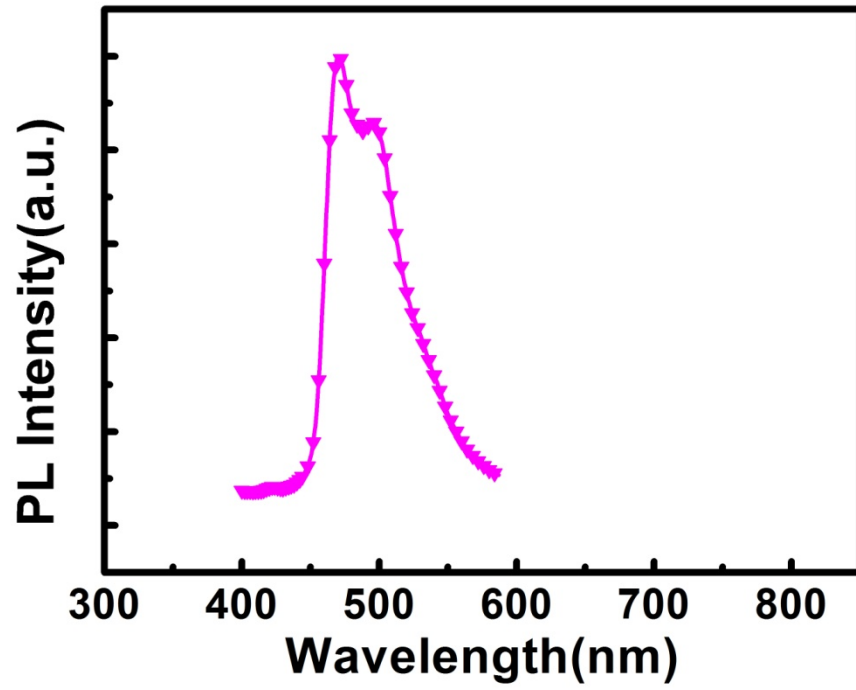

Supplement: c5tc01913c1.pdf [file c5tc01913c1.pdf]
